# Supplementary material for: Crystal-Modeler: A Tool for Geometric Analysis and Three-Dimensional Modeling of Crystal Forms Based on Rectangular Coordinates in Space
Source: Research Square preprint supplement (doi:10.21203/rs.3.rs-1727761/v1), 2022-07-05
Supplement: Supplementary file 1 [file 4026aa6ea35b33f7a6acb6b9.docx]

Appendix A. The coordinates of each vertex of the 47 kinds of geometric form

| **Schedule：Vertex coordinates of 47 types of form** | |
| --- | --- |
| **---Low level crystal group form** | |
| Pedion | (-1,0,1), (1,0,1), (1,0, -1), (-1,0, -1) |
| Rhombic prism | (-1,0,0), (1,0,0), (0,0,1.6), (0,0, -1.6), (-0.5,2,0), (1.5,2,0), (0.5,2,1.6), (0.5,2, -1.6) |
| Rhombic disphenoid | (-1,0,0), (1,0,0), (0.5,2,0.87), (-0.5,2, -0.87) |
| Rhombic pyramid | (-1,0,0), (1,0,0), (0,0,1.6), (0,0, -1.6), (0,2,0) |
| Rhombic dipyramid | (-1,0,0), (1,0,0), (0,0,1.6), (0,0, -1.6), (0,2,0), (0, -2,0) |
| **---Intermediate crystal group form** | |
| trigonal prism | (0,0,1), (0.87,0, -0.5), (-0.87,0, -0.5), (0,2,1), (0.87,2, -0.5), (-0.87,2, -0.5) |
| ditrigonal prism | (0,0,1), (0.87,0, -0.5), (-0.87,0, -0.5), (0.58,0,0.33), (0,0, -0.67), (-0.58,0,0.33), (0,2,1), (0.87,2, -0.5), (-0.87,2, -0.5), (0.58,2,0.33), (0,2, -0.67), (-0.58,2,0.33) |
| tetragonal prism | (0,0,1), (1,0,0), (0,0, -1), (-1,0,0), (0,2,1), (1,2,0), (0,2, -1), (-1,2,0) |
| ditetragonal prism | (0,0,1), (1,0,0), (0,0, -1), (-1,0,0), (0.57,0,0.57), (0.57,0, -0.57), (-0.57,0, -0.57), (-0.57,0,0.57), (0,2,1), (1,2,0), (0,2, -1), (-1,2,0), (0.57,2,0.57), (0.57,2, -0.57), (-0.57,2, -0.57), (-0.57,2,0.57) |
| hexagonal prism | (0,0,1), (0.87,0,0.5), (0.87,0, -0.5), (0,0, -1), (-0.87,0, -0.5), (-0.87,0,0.5), (0,2,1), (0.87,2,0.5), (0.87,2, -0.5), (0,2, -1), (-0.87,2, -0.5), (-0.87,2,0.5) |
| Dihexagonal prism | (0,0,1), (0.87,0,0.5), (0.87,0, -0.5), (0,0, -1), (-0.87,0, -0.5), (-0.87,0,0.5), (0.46,0,0.79), (0.91,0,0), (0.46,0, -0.79), (-0.46,0, -0.79), (-0.91,0,0), (-0.46,0,0.79), (0,2,1), (0.87,2,0.5), (0.87,2, -0.5), (0,2, -1), (-0.87,2, -0.5), (-0.87,2,0.5), (0.46,2,0.79), (0.91,2,0), (0.46,2, -0.79), (-0.46,2, -0.79), (-0.91,2,0), (-0.46,2,0.79) |
| Trigonal pyramid | (0,0,1), (0.87,0, -0.5), (-0.87,0, -0.5), (0,2,0) |
| Ditrigonal pyramid | (0,0,1), (0.87,0, -0.5), (-0.87,0, -0.5), (0.58,0,0.33), (0,0, -0.67), (-0.58,0,0.33), (0,2,0) |
| Tetragonal pyramid, | (0,0,1), (1,0,0), (0,0, -1), (-1,0,0), (0,2,0) |
| Ditetragonal pyramid | (0,0,1), (1,0,0), (0,0, -1), (-1,0,0), (0.57,0,0.57), (0.57,0, -0.57),  (-0.57,0, -0.57), (-0.57,0,0.57), (0,2,0) |
| Hexagonal pyramid | (0,0,1), (0.87,0,0.5), (0.87,0, -0.5), (0,0, -1), (-0.87,0, -0.5), (-0.87,0,0.5), (0,2,0) |
| Dihexagonal pyramid | (0,0,1), (0.87,0,0.5), (0.87,0, -0.5), (0,0, -1), (-0.87,0, -0.5), (-0.87,0,0.5), (0.46,0,0.79), (0.91,0,0), (0.46,0, -0.79), (-0.46,0, -0.79), (-0.91,0,0), (-0.46,0,0.79), (0,2,0) |
| Trigonal dipyramid | (0,0,1), (0.87,0, -0.5), (-0.87,0, -0.5), (0,2,0), (0, -2,0) |
| Ditrigonal dipyramid | (0,0,1), (0.87,0, -0.5), (-0.87,0, -0.5), (0.58,0,0.33), (0,0, -0.67), (-0.58,0,0.33), (0,2,0), (0, -2,0) |
| Tetragonal dipyramid | (0,0,1), (1,0,0), (0,0, -1), (-1,0,0), (0,2,0), (0, -2,0) |
| Ditetragonal dipyramid | (0,0,1), (1,0,0), (0,0, -1), (-1,0,0), (0.57,0,0.57), (0.57,0, -0.57), (-0.57,0, -0.57), (-0.57,0,0.57), (0,2,0), (0, -2,0) |
| Hexagonal dipyramid | (0,0,1), (0.87,0,0.5), (0.87,0, -0.5), (0,0, -1), (-0.87,0, -0.5), (-0.87,0,0.5), (0,2,0), (0, -2,0) |
| Dihexagonal dipyramid | (0,0,1), (0.87,0,0.5), (0.87,0, -0.5), (0,0, -1), (-0.87,0, -0.5), (-0.87,0,0.5), (0.46,0,0.79), (0.91,0,0), (0.46,0, -0.79), (-0.46,0, -0.79), (-0.91,0,0), (-0.46,0,0.79), (0,2,0), (0, -2,0) |
| tetragonal disphenoid | (1,1.2, -1), (1, -1.2,1), (-1,1.2,1), (-1, -1.2, -1) |
| tetragonal scalenohedron | (1,1.2, -1), (1, -1.2,1), (-1,1.2,1), (-1, -1.2, -1), (0,1.44,0), (0, -1.44,0) |
| rhombohedron | (0,0.65,1), (0.87, -0.65,0.5), (0.87,0.65, -0.5), (0, -0.65, -1), (-0.87,0.65, -0.5), (-0.87, -0.65,0.5), (0,1.95,0), (0, -1.95,0) |
| ditrigonal scalenohedron | (0,0.52,1), (0.87, -0.52,0.5), (0.87,0.52, -0.5), (0, -0.52, -1), (-0.87,0.52, -0.5), (-0.87, -0.52,0.5), (0,1.95,0), (0, -1.95,0) |
| trigonal trapezohedron（left） | (0, -1.5,0), (0,1.5,0), (0.78, -0.32, -0.14), (0,0.32,0.79), (-0.51, -0.32, -0.61), (0.68,0.32, -0.39), (-0.27, -0.32,0.74), (-0.68,0.32, -0.39) |
| trigonal trapezohedron（right） | (0, -1.5,0), (0,1.5,0), (0.27, -0.32,0.74), (0,0.32,0.79), (0.51, -0.32, -0.61), (0.68,0.32, -0.39), (-0.78, -0.32, -0.14), (-0.68,0.32, -0.39) |
| tetragonal trapezohedron（left） | (0, -1.5,0), (0,1.5,0), (0.82, -0.19,0.3), (0,0.19,0.88), (0.3, -0.19, -0.82), (0.88,0.19,0), (-0.82, -0.19, -0.3), (0,0.19, -0.88), (-0.3, -0.19,0.82), (-0.88,0.19,0) |
| tetragonal trapezohedron（right） | (0, -1.5,0), (0,1.5,0), (0.3, -0.19,0.82), (0,0.19,0.88), (0.82, -0.19, -0.3), (0.88,0.19,0), (-0.3, -0.19, -0.82), (0,0.19, -0.88), (-0.82, -0.19,0.3), (-0.88,0.19,0) |
| hexagonal trapezohedron（left） | (0, -1.5,0), (0,1.5,0), (0.6, -0.1,0.72), (0,0.1,0.94), (0.92, -0.1, -0.16), (0.81,0.1,0.47), (0.32, -0.1, -0.88), (0.81,0.1, -0.47), (-0.6, -0.1, -0.72), (0,0.1, -0.94), (-0.92, -0.1,0.16), (-0.81,0.1, -0.47), (-0.32, -0.1,0.88), (-0.81,0.1,0.47) |
| hexagonal trapezohedron（right） | (0, -1.5,0), (0,1.5,0), (0.32, -0.1,0.88), (0,0.1,0.94), (0.92, -0.1,0.16), (0.81,0.1,0.47), (0.6, -0.1, -0.72), (0.81,0.1, -0.47), (-0.32, -0.1, -0.88), (0,0.1, -0.94), (-0.92, -0.1, -0.16), (-0.81,0.1, -0.47), (-0.6, -0.1,0.72), (-0.81,0.1,0.47) |
| **---High level crystal group form** | |
| tetrahedron | (1,1, -1), (1, -1,1), (-1,1,1), (-1, -1, -1) |
| trigonal tristetrahedron | (1,1, -1), (1, -1,1), (-1,1,1), (-1, -1, -1), (0.4,0.4,0.4), (-0.4,0.4, -0.4), (0.4, -0.4, -0.4), (-0.4, -0.4,0.4) |
| tetragonal tristetrahedron | (1,1, -1), (1, -1,1), (-1,1,1), (-1, -1, -1), (-1.3,0,0), (0,0, -1.3), (0, -1.3,0), (1.3,0,0), (0,0,1.3), (0,1.3,0), (0.48,0.48,0.48), (-0.48,0.48, -0.48), (0.48, -0.48, -0.48), (-0.48, -0.48,0.48) |
| Hexatetrahedron | (1,1, -1), (1, -1,1), (-1,1,1), (-1, -1, -1), (-1.3,0,0), (0,0, -1.3), (0, -1.3,0), (1.3,0,0), (0,0,1.3), (0,1.3,0), (0.58,0.58,0.58), (-0.58,0.58, -0.58), (0.58, -0.58, -0.58), (-0.58, -0.58,0.58) |
| tetartoid（left） | (1.3, -0.32,0.68), (1.3,0.32, -0.68), (-0.68,1.3,0.32), (0.68,1.3, -0.32), (-0.32, -0.68, -1.3), (0.32,0.68, -1.3), (-0.32,0.68,1.3), (0.32, -0.68,1.3), (-0.68, -1.3, -0.32), (0.68, -1.3,0.32), (-1.3, -0.32, -0.68), (-1.3,0.32,0.68), (1.01,1.01, -1.01), (1.01, -1.01,1.01), (-1.01,1.01,1.01), (-1.01, -1.01, -1.01), (0.73,0.73,0.73), (0.73, -0.73, -0.73), (-0.73, -0.73,0.73), (-0.73,0.73, -0.73) |
| tetartoid （right） | (1.3, -0.68,0.32), (1.3,0.68, -0.32), (-0.32,1.3,0.68), (0.32,1.3, -0.68), (-0.68, -0.32, -1.3), (0.68,0.32, -1.3), (-0.68,0.32,1.3), (0.68, -0.32,1.3), (-0.32, -1.3, -0.68), (0.32, -1.3,0.68), (-1.3, -0.68, -0.32), (-1.3,0.68,0.32), (1.01,1.01, -1.01), (1.01, -1.01,1.01), (-1.01,1.01,1.01), (-1.01, -1.01, -1.01), (0.73,0.73,0.73), (0.73, -0.73, -0.73), (-0.73, -0.73,0.73), (-0.73,0.73, -0.73) |
| Octahedron | (0,0,1), (1,0,0), (0,0, -1), (-1,0,0), (0,1,0), (0, -1,0) |
| trigonal trisoctahedron | (0,0,1), (1,0,0), (0,0, -1), (-1,0,0), (0,1,0), (0, -1,0), (0.49,0.49,0.49), (0.49, -0.49,0.49), (0.49, -0.49, -0.49), (0.49,0.49, -0.49), (-0.49, -0.49, -0.49), (-0.49,0.49, -0.49), (-0.49,0.49,0.49), (-0.49, -0.49,0.49) |
| trapezohedron | (0,0,1), (1,0,0), (0,0, -1), (-1,0,0), (0,1,0), (0, -1,0), (0.7,0,0.7), (0.7,0.7,0), (0,0.7,0.7), (0.7,0, -0.7), (0.7, -0.7,0), (0, -0.7,0.7), (-0.7,0, -0.7), (-0.7, -0.7,0), (0, -0.7, -0.7), (-0.7,0,0.7), (-0.7,0.7,0), (0,0.7, -0.7), (0.54,0.54,0.54), (0.54, -0.54,0.54), (0.54, -0.54, -0.54), (0.54,0.54, -0.54), (-0.54, -0.54, -0.54), (-0.54,0.54, -0.54), (-0.54,0.54,0.54), (-0.54, -0.54,0.54) |
| gyroid（left） | (0.94,0.12,0.46), (0.46, -0.12,0.94), (-0.94, -0.12,0.46), (-0.46,0.12,0.94), (-0.12,0.94,0.46), (0.12,0.46,0.94), (0.12, -0.94,0.46), (-0.12, -0.46,0.94), (0.46,0.12, -0.94), (0.94, -0.12, -0.46), (0.46,0.94,0.12), (0.94,0.46, -0.12), (0.46, -0.94, -0.12), (0.94, -0.46,0.12), (-0.94,0.12, -0.46), (-0.46, -0.12, -0.94), (0.12,0.94, -0.46), (-0.12,0.46, -0.94), (-0.12, -0.94, -0.46), (0.12, -0.46, -0.94), (-0.46,0.94, -0.12), (-0.94,0.46,0.12), (-0.46, -0.94,0.12), (-0.94, -0.46, -0.12), (0,0,1.24), (1.24,0,0), (0,0, -1.24), (-1.24,0,0), (0,1.24,0), (0, -1.24,0), (-0.56, -0.56, -0.56), (-0.56,0.56, -0.56), (-0.56, -0.56,0.56), (-0.56,0.56,0.56), (0.56, -0.56, -0.56), (0.56,0.56, -0.56), (0.56, -0.56,0.56), (0.56,0.56,0.56) |
| gyroid（right） | (0.94, -0.12,0.46), (0.46,0.12,0.94), (-0.94,0.12,0.46), (-0.46, -0.12,0.94), (0.12,0.94,0.46), (-0.12,0.46,0.94), (-0.12, -0.94,0.46), (0.12, -0.46,0.94), (0.46, -0.12, -0.94), (0.94,0.12, -0.46), (0.46,0.94, -0.12), (0.94,0.46,0.12), (0.46, -0.94,0.12), (0.94, -0.46, -0.12), (-0.94, -0.12, -0.46), (-0.46,0.12, -0.94), (-0.12,0.94, -0.46), (0.12,0.46, -0.94), (0.12, -0.94, -0.46), (-0.12, -0.46, -0.94), (-0.46,0.94,0.12), (-0.94,0.46, -0.12), (-0.46, -0.94, -0.12), (-0.94, -0.46,0.12), (0,0,1.24), (1.24,0,0), (0,0, -1.24), (-1.24,0,0), (0,1.24,0), (0, -1.24,0), (-0.56, -0.56, -0.56), (-0.56,0.56, -0.56), (-0.56, -0.56,0.56), (-0.56,0.56,0.56), (0.56, -0.56, -0.56), (0.56,0.56, -0.56), (0.56, -0.56,0.56), (0.56,0.56,0.56) |
| Hexaoctahedron | (0,0,1), (1,0,0), (0,0, -1), (-1,0,0), (0,1,0), (0, -1,0), (0.7,0,0.7), (0.7,0.7,0), (0,0.7,0.7), (0.7,0, -0.7), (0.7, -0.7,0), (0, -0.7,0.7), (-0.7,0, -0.7), (-0.7, -0.7,0), (0, -0.7, -0.7), (-0.7,0,0.7), (-0.7,0.7,0), (0,0.7, -0.7), (0.65,0.65,0.65), (0.65, -0.65,0.65), (0.65, -0.65, -0.65), (0.65,0.65, -0.65), (-0.65, -0.65, -0.65), (-0.65,0.65, -0.65), (-0.65,0.65,0.65), (-0.65, -0.65,0.65) |
| cube | (-1, -1, -1), (-1,1, -1), (-1, -1,1), (-1,1,1), (1, -1, -1), (1,1, -1), (1, -1,1), (1,1,1) |
| Tetrahexahedron | (-1, -1, -1), (-1,1, -1), (-1, -1,1), (-1,1,1), (1, -1, -1), (1,1, -1), (1, -1,1), (1,1,1)(-1.4,0,0), (0,0, -1.4), (0, -1.4,0), (1.4,0,0), (0,0,1.4), (0,1.4,0) |
| Rhomb-dodecahedron | (-1, -1, -1), (-1,1, -1), (-1, -1,1), (-1,1,1), (1, -1, -1), (1,1, -1), (1, -1,1), (1,1,1)  (-2,0,0), (0,0, -2), (0, -2,0), (2,0,0), (0,0,2), (0,2,0) |
| pyritohedron | (-1, -1, -1), (-1,1, -1), (-1, -1,1), (-1,1,1), (1, -1, -1), (1,1, -1), (1, -1,1), (1,1,1), (0, -0.91, -1.3), (-0.91, -1.3,0), (-1.3,0, -0.91), (0,0.91, -1.3), (0.91, -1.3,0), (-1.3,0,0.91), (0, -0.91,1.3), (-0.91,1.3,0), (1.3,0, -0.91), (0,0.91,1.3), (0.91,1.3,0), (1.3,0,0.91) |
| diploid | (-1, -1, -1), (-1,1, -1), (-1, -1,1), (-1,1,1), (1, -1, -1), (1,1, -1), (1, -1,1), (1,1,1), (0, -0.68, -1.62), (-0.68, -1.62,0), (-1.62,0, -0.68), (0,0.68, -1.62), (0.68, -1.62,0), (-1.62,0,0.68), (0, -0.68,1.62), (-0.68,1.62,0), (1.62,0, -0.68), (0,0.68,1.62), (0.68,1.62,0), (1.62,0,0.68), (-1.65,0,0), (0,0, -1.65), (0, -1.65,0), (1.65,0,0), (0,0,1.65), (0,1.65,0) |
